# Supplementary material
Source: PubMed Central journal article supplement (PMC2639290)

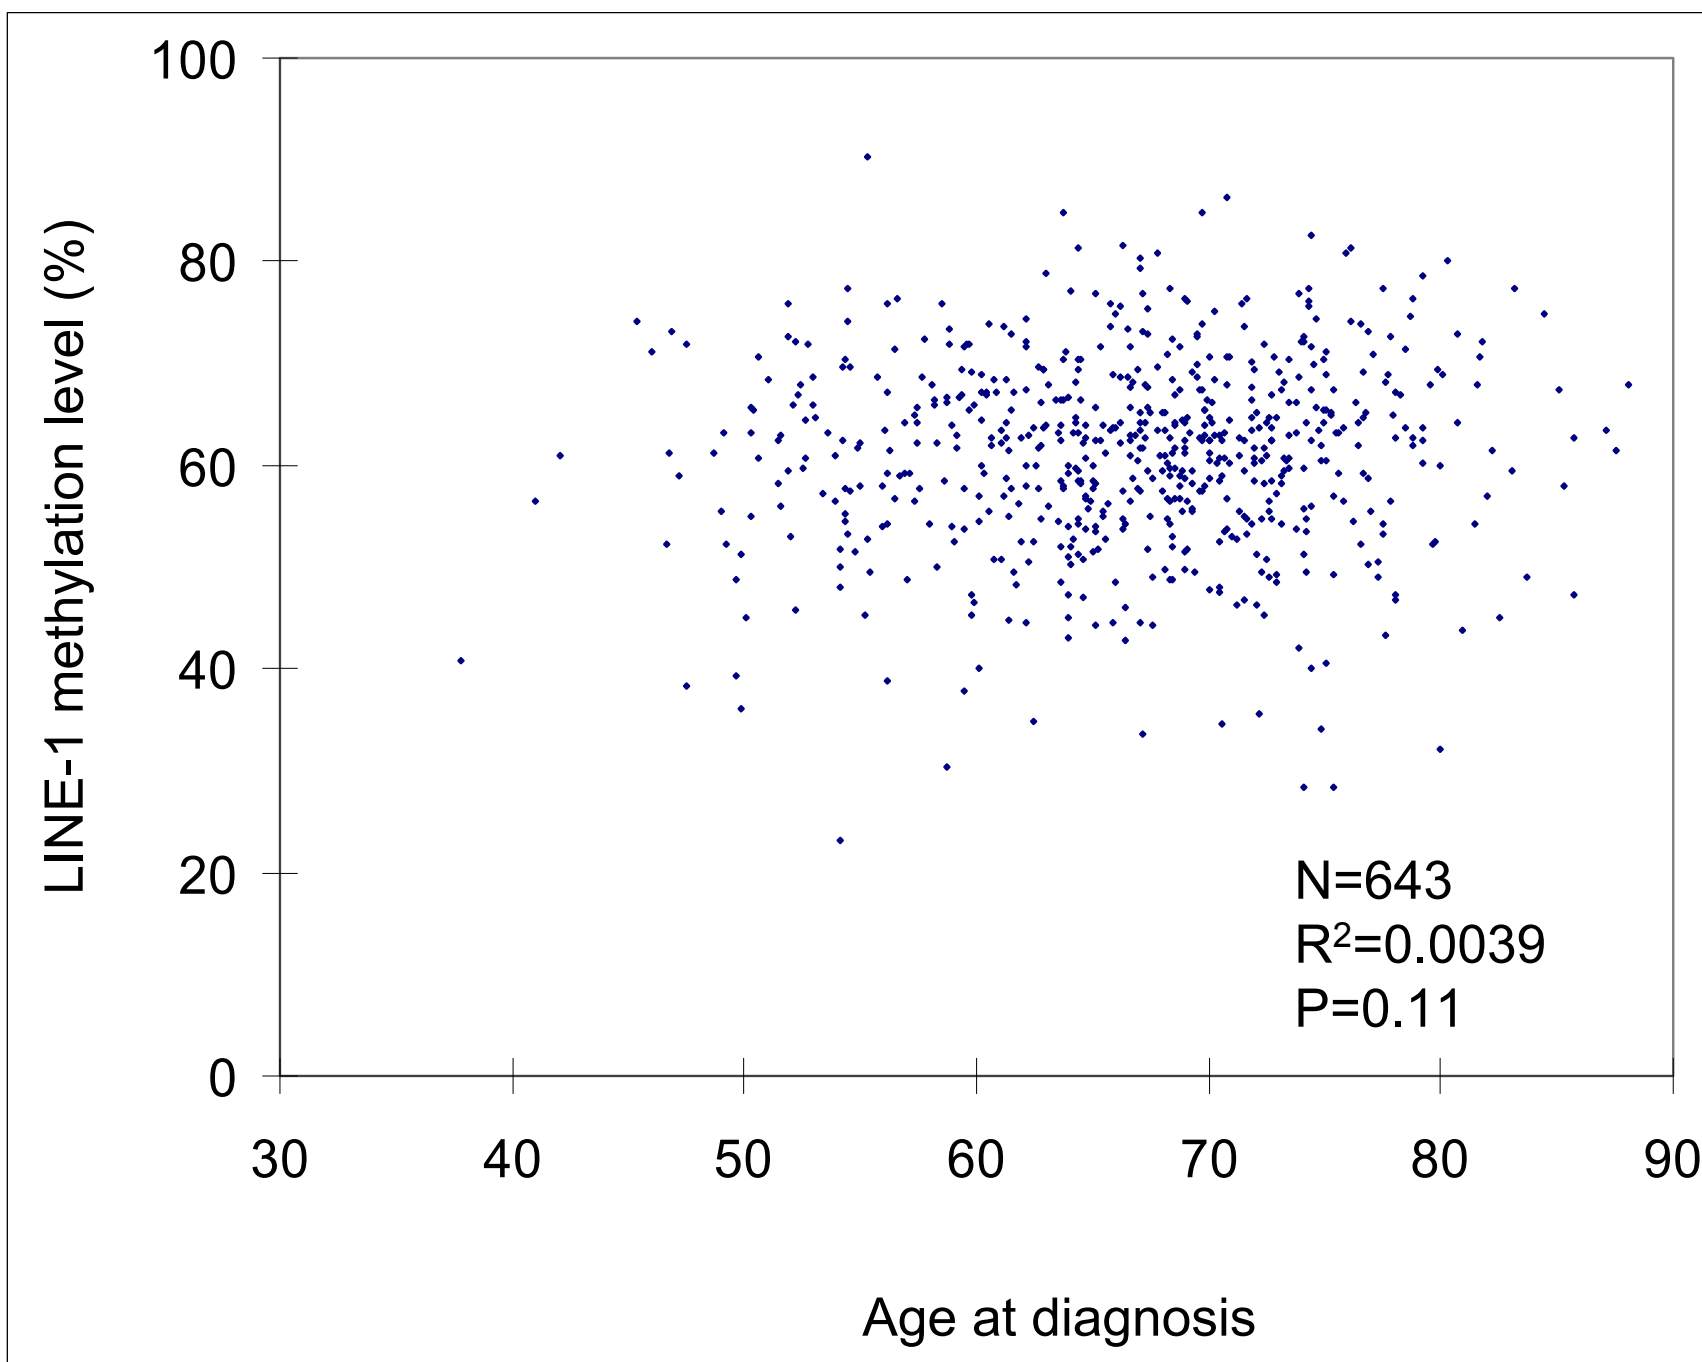

Supplemental figure 1

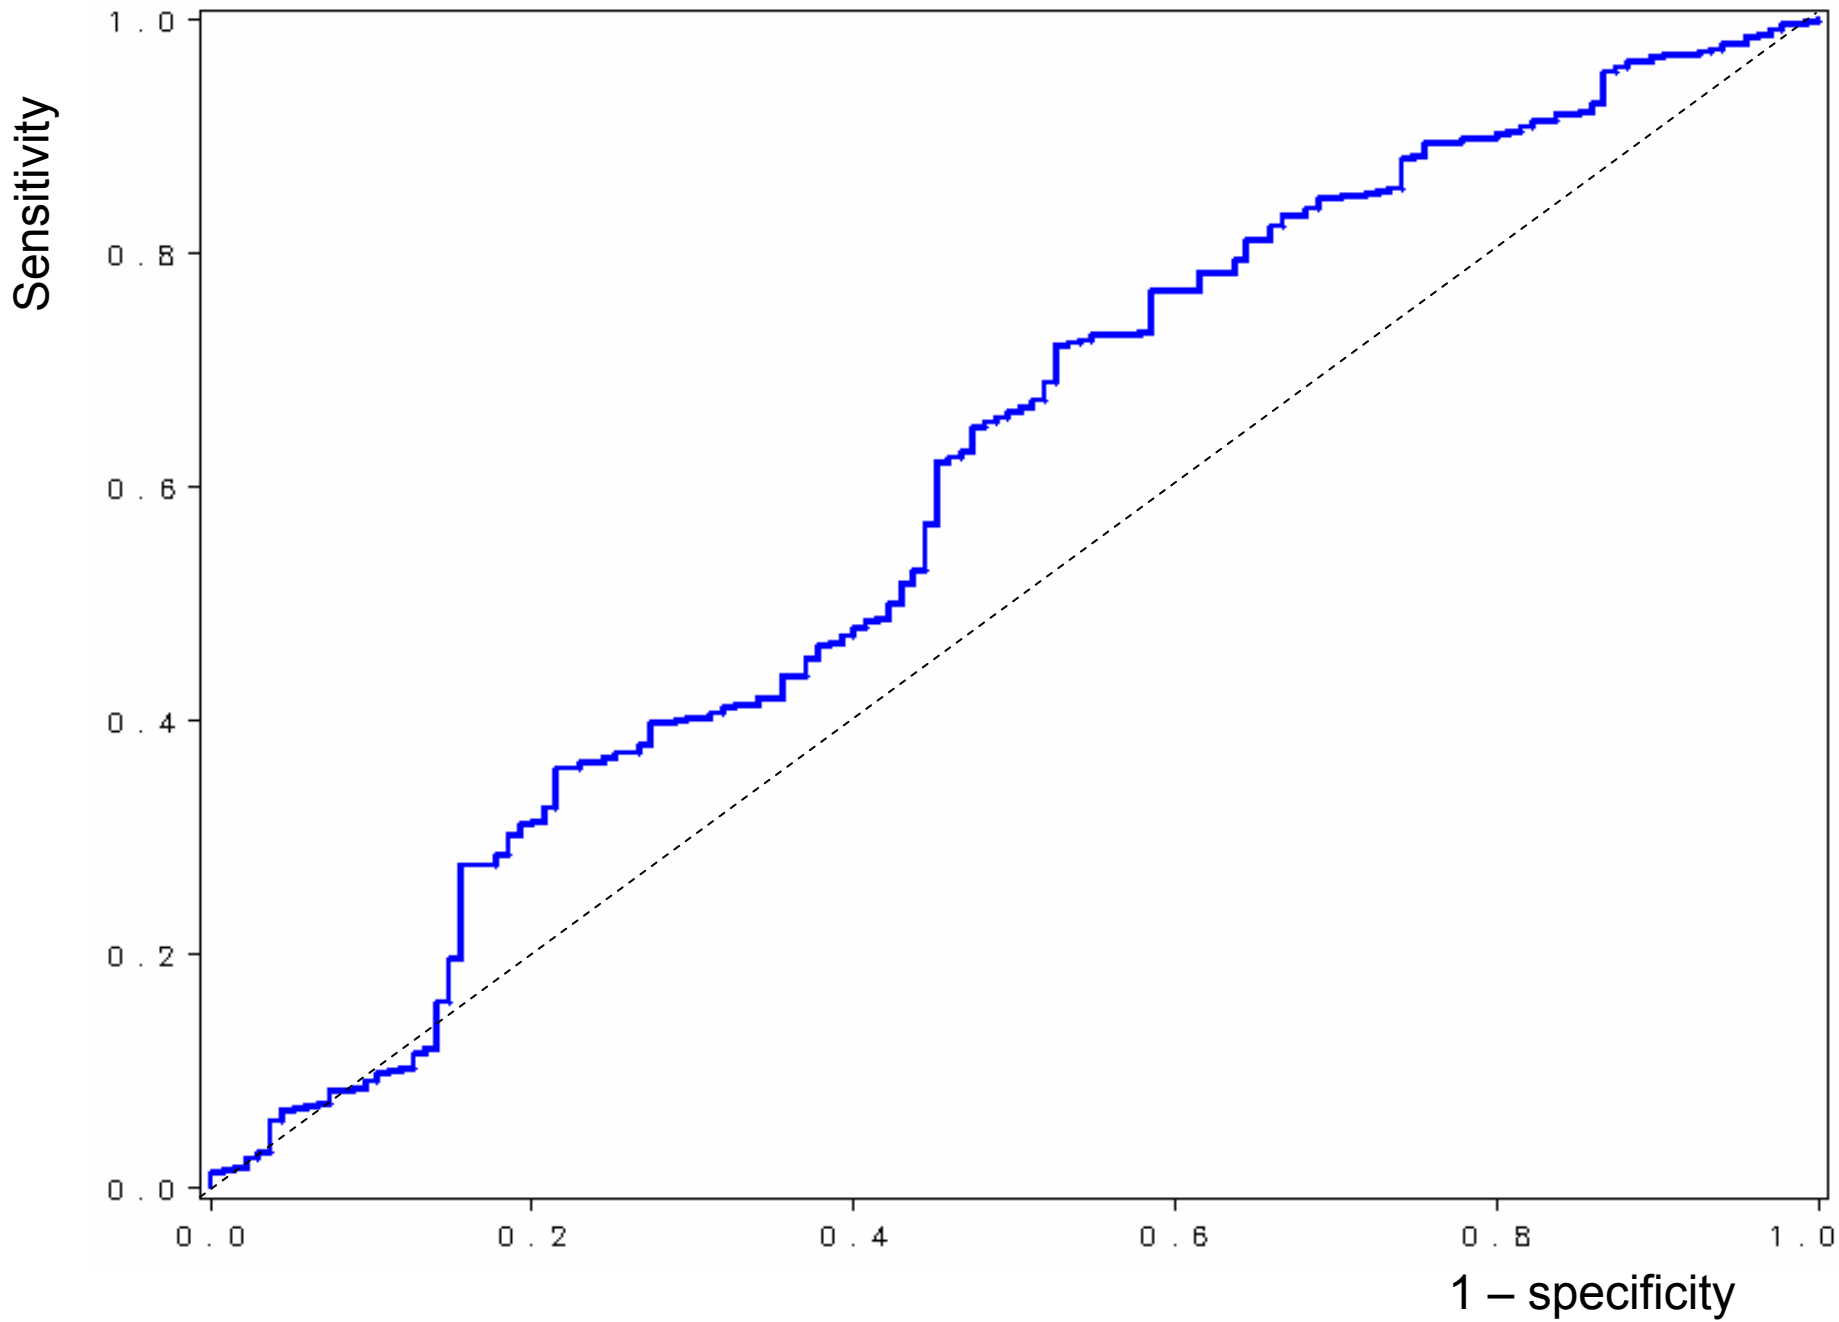

Supplemental Figure 2

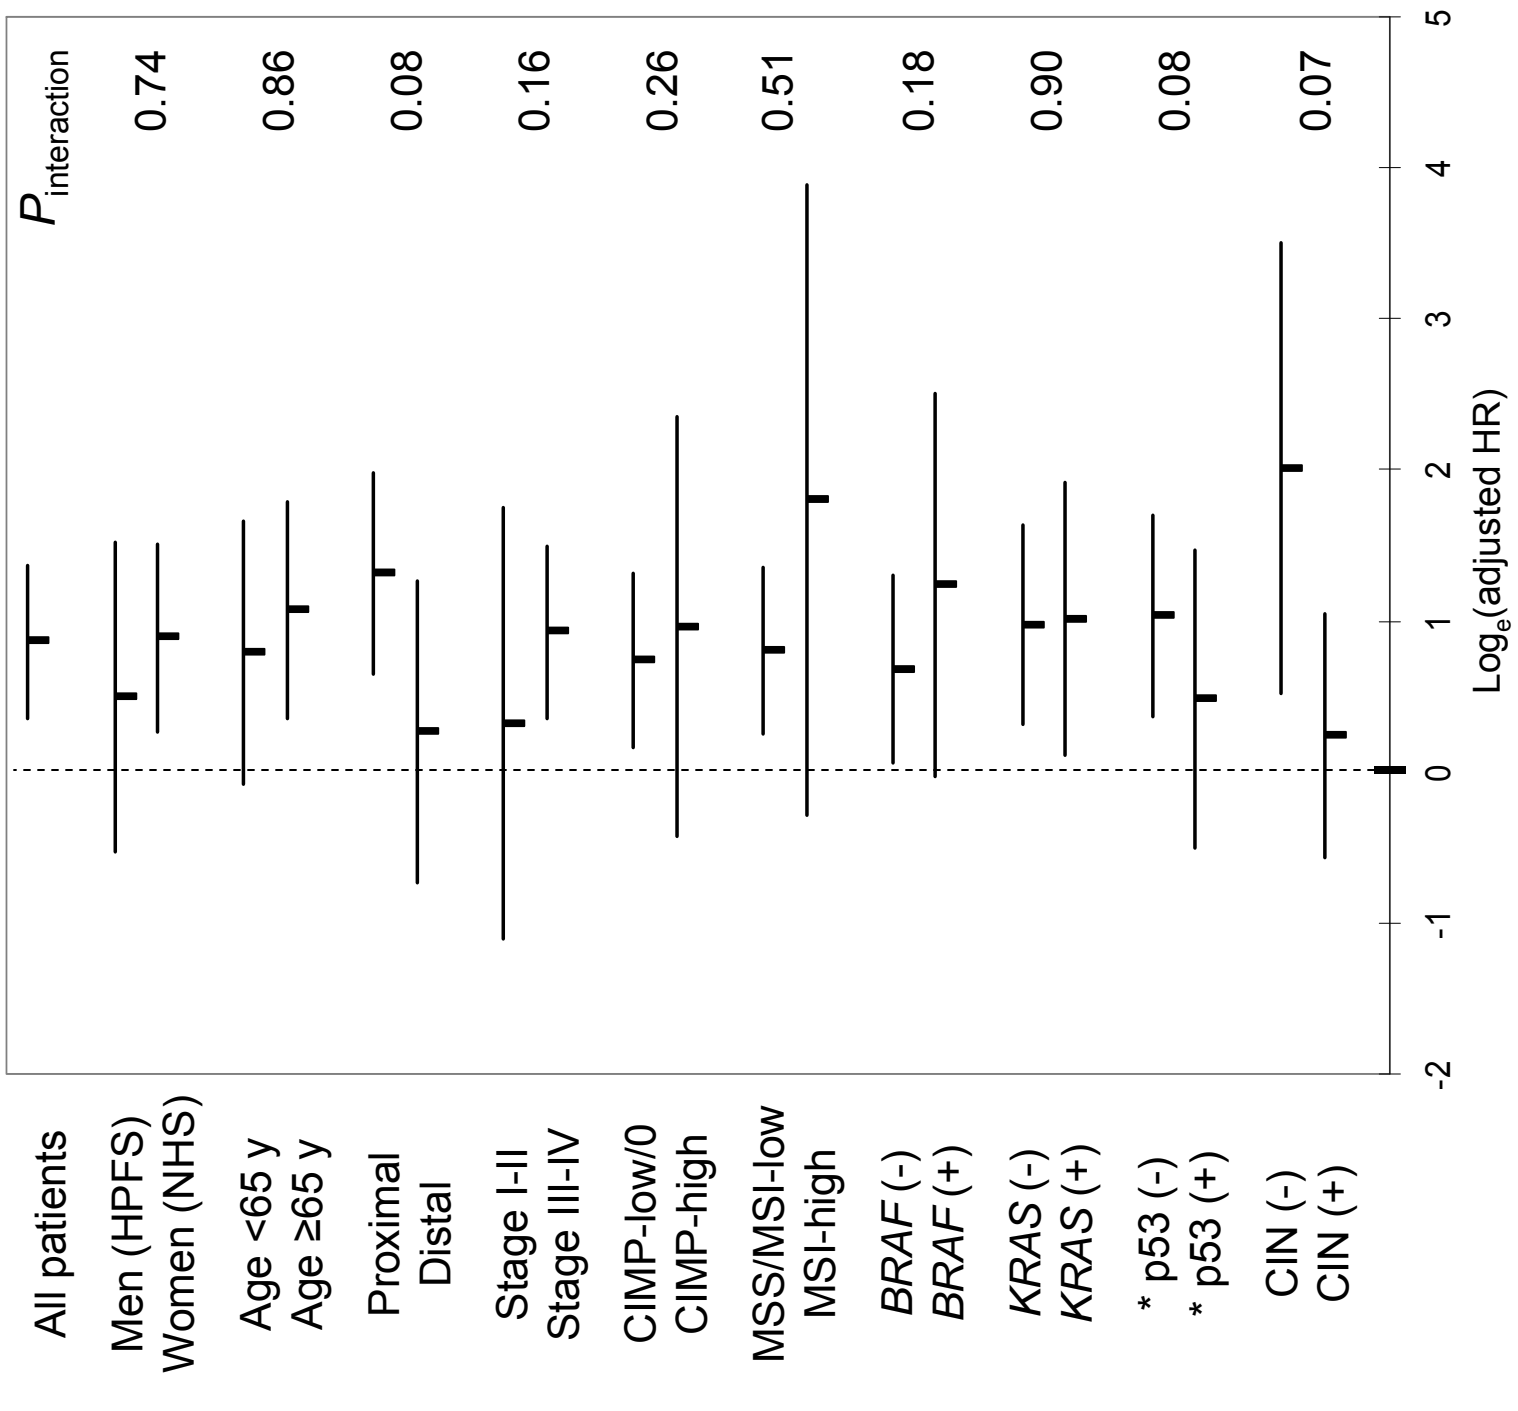

Supplemental Figure 3

Supplement: djn359_1.pdf [file djn359_1.pdf]
